# Supplementary material for: Programming bulk enzyme heterojunctions for biosensor development with tetrahedral DNA framework
Source: PubMed Central journal article supplement (PMC7012893; doi:10.1038/s41467-020-14664-8), 2020-02-11
Supplement: 41467_2020_14664_MOESM3_ESM.pdf [file 41467_2020_14664_MOESM3_ESM.pdf]

## **Description of Additional Supplementary Files**

File Name: Supplementary Data 1

Description: DNA sequences for TDN and TDN-enzyme conjugation.

File Name: Supplementary Data 2

Description: DNA sequences for origami and origami-enzyme conjugation

File Name: Supplementary Data 3

Description: The disease Grade of PCa patients.
